# Supplementary material for: Thyroxine Induces Acute Relaxation of Rat Skeletal Muscle Arteries via Integrin αvβ3, ERK1/2 and Integrin-Linked Kinase
Source: PubMed Central journal article supplement (PMC8477044; doi:10.3389/fphys.2021.726354), 2021-09-14
Supplement: Image_1.pdf [file Image_1.pdf]

# Thyroxine induces acute relaxation of rat skeletal muscle arteries via integrin $\alpha\beta3$ , ERK1/2 and integrin-linked kinase

Ekaterina Selivanova, Dina Gaynullina, Olga Tarasova

## *Supplementary Materials*

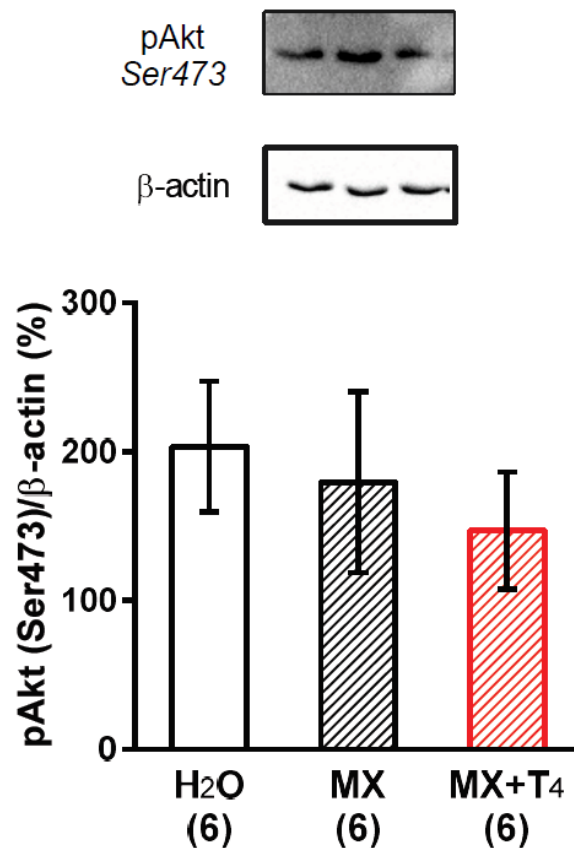

**Supplementary Figure 1.** T<sub>4</sub> does not affect phospho-Akt (Ser473) content in sural arteries. The representative membrane parts are shown in the top. Data were normalized to  $\beta$ -actin level in the same sample and then the average value of two reference samples was taken as 100%. Number in parentheses represents the number of animals.
